# Supplementary material for: Viscosity is an important factor of resistance to alcohol-based disinfectants by pathogens present in mucus
Source: PubMed Central journal article supplement (PMC5640602; doi:10.1038/s41598-017-13732-2), 2017-10-13
Supplement: 41598_2017_13732_MOESM1_ESM.pdf [file 41598_2017_13732_MOESM1_ESM.pdf]

## **Supplementary information (Supplementary figures and tables)**

### **Viscosity is an important factor of resistance to alcohol-based disinfectants by pathogens present in mucus**

Ryohei Hirose, Takaaki Nakaya, Yuji Naito, Tomo Daidoji, Yohei Watanabe, Hiroaki Yasuda, Hideyuki Konishi, Yoshito Itoh

#### **Table of Contents**

1. Supplementary Figure S1.
2. Supplementary Figure S2.
3. Supplementary Figure S3.
4. Supplementary Table S1.
5. Supplementary Table S2.
6. Supplementary Table S3.
7. Supplementary Table S4.

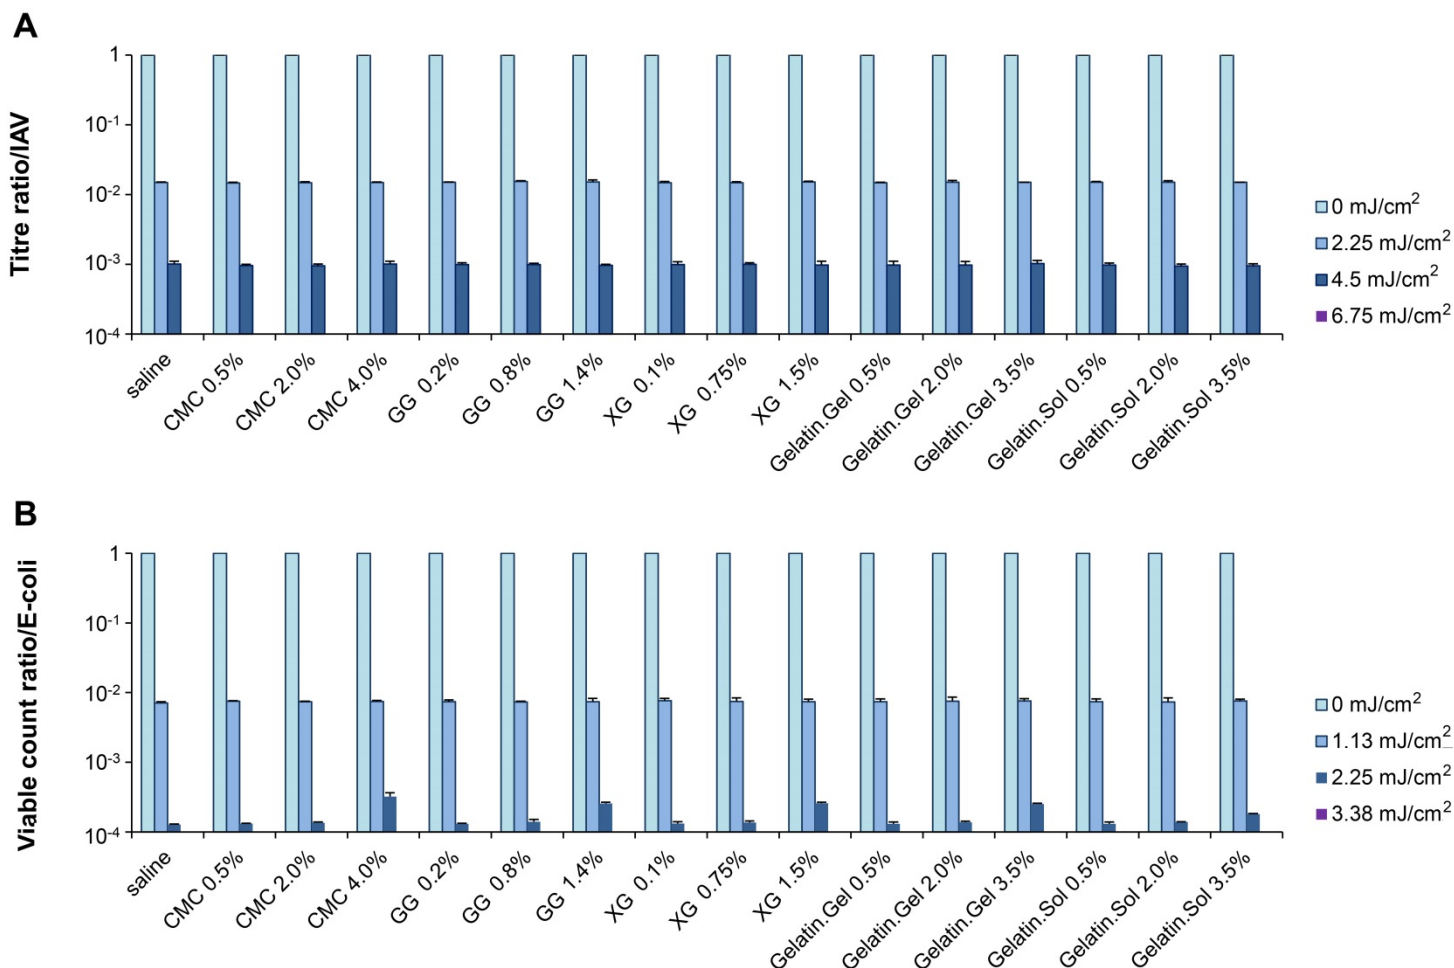

**Supplementary Figure S1. Effect of UV radiation on virus and bacteria.** (A) IAV was mixed with saline or artificial mucus (CMC, carboxymethyl cellulose; GG, guar gum; XG, xanthan gum; or gelatin gel/sol) and then exposed to UV radiation (0, 2.25, 4.5, or 6.75 mJ/cm<sup>2</sup>) before titre ratio was measured. (B) *E. coli* cells were mixed with saline or artificial mucus and then exposed to UV radiation (0, 1.13, 2.25, or 3.38 mJ/cm<sup>2</sup>) before viable count ratio was determined.

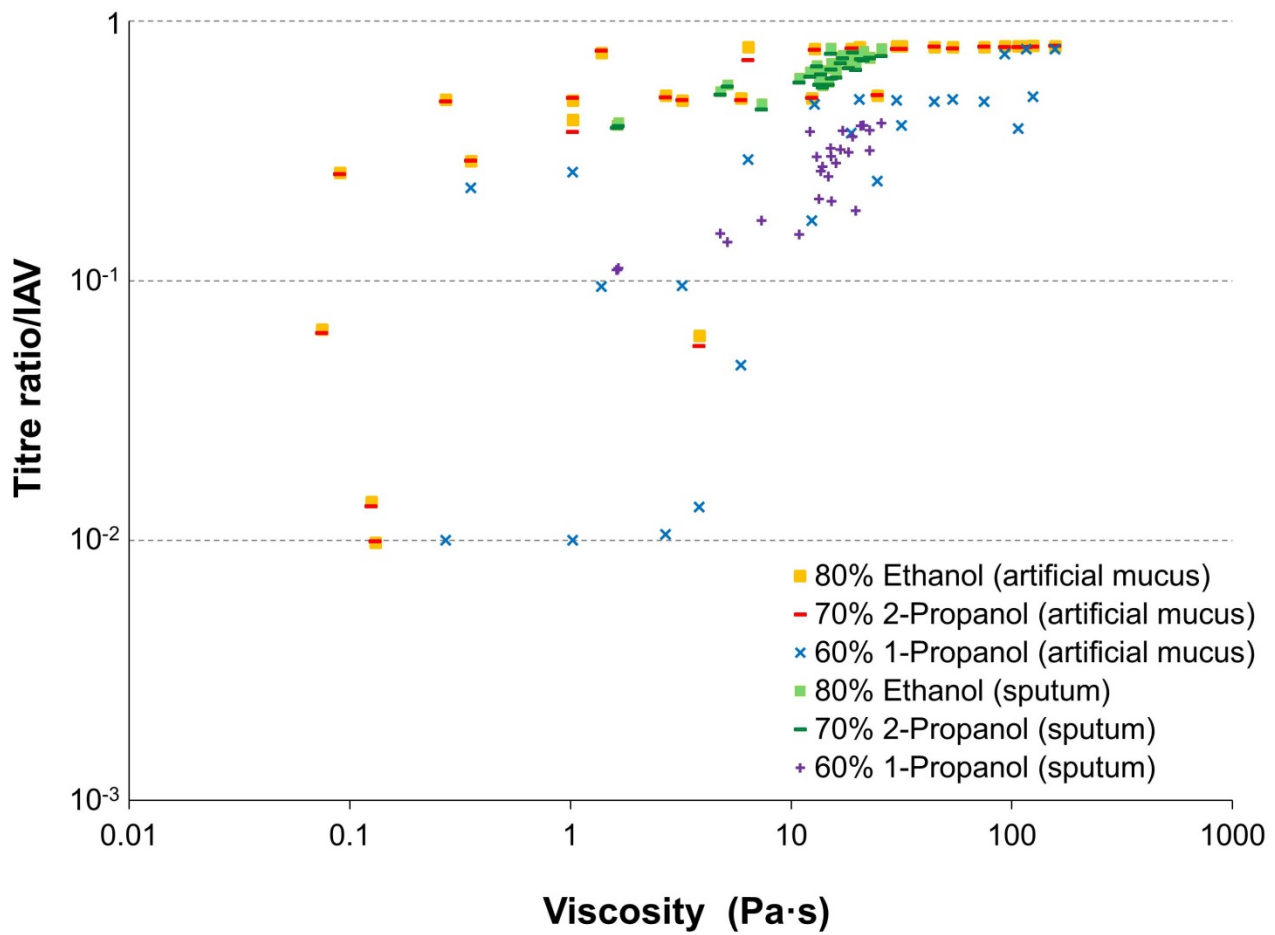

**Supplementary Figure S2. Comparison the protective effects between artificial mucus and sputum samples.** Scatter plots for tests performed using artificial mucus and sputum samples were merged (Figs. 3A and 5A) to compare protective capacities of the two types of mucus.

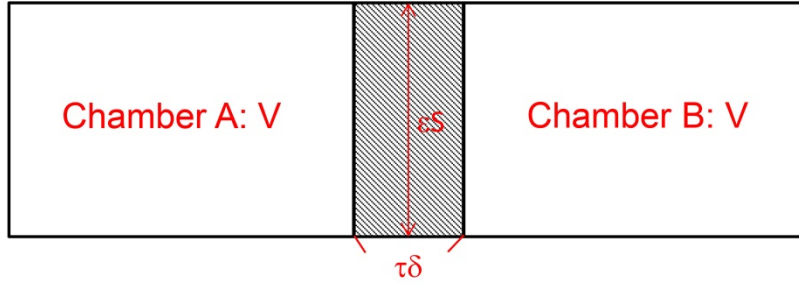

$V = 2.0 \times 10^{-5} \text{ m}^3$  (20 ml)  
 $\varepsilon S = 3.14 \text{ mm}^2$   
 $\tau\delta = 10 \text{ mm}$   
 $C_{A0} = 0.435 \text{ kmol/m}^3$   
 $C_{B0} = 0 \text{ kmol/m}^3$   
 $t = 7.2 \times 10^3 \text{ sec}$

Ethanol concentration (0 sec):  $C_{A0}$   
 Ethanol concentration (t sec):  $C_{At}$

Ethanol concentration (0 sec):  $C_{B0}$   
 Ethanol concentration (t sec):  $C_{Bt}$

$D = \text{Diffusion coefficient}$ 

$$\ln \frac{C_{A0} - C_{B0}}{C_{At} - C_{Bt}} = \frac{2\varepsilon S}{\tau\delta V} Dt$$

**Supplementary Figure S3. Experimental setup to evaluate the diffusion rate of ethanol.** A polyethylene container with two chambers (A and B) was used for the experiment. Changes in ethanol concentration in chambers A and B due to diffusion were measured to calculate the diffusion coefficient of ethanol. Chamber A was filled with ethanol, and chamber B was filled with xanthan gum-based artificial mucus, saline, or water. After 120 minutes of diffusion, the ethanol concentration in each chamber was measured, and the diffusion coefficient calculated.

**Supplementary Table 1. Viscosity and titre ratio (IAV) of sputum samples.**

|           | Viscosity (Pa-s)     | Titre Ratio (IAV), mean $\pm$ SD            |                                             |                                             |
|-----------|----------------------|---------------------------------------------|---------------------------------------------|---------------------------------------------|
|           |                      | 80% Ethanol                                 | 70% 2-Propanol                              | 60% 1-Propanol                              |
| saline    | $1.0 \times 10^{-3}$ | $0.0 \pm 0.0$                               | $0.0 \pm 0.0$                               | $0.0 \pm 0.0$                               |
| Sample 1  | $5.2 \times 10^0$    | $5.7 \times 10^{-1} \pm 7.2 \times 10^{-3}$ | $5.6 \times 10^{-1} \pm 7.3 \times 10^{-2}$ | $1.4 \times 10^{-1} \pm 6.9 \times 10^{-3}$ |
| Sample 2  | $1.5 \times 10^1$    | $6.9 \times 10^{-1} \pm 2.6 \times 10^{-2}$ | $6.5 \times 10^{-1} \pm 3.7 \times 10^{-3}$ | $3.0 \times 10^{-1} \pm 1.1 \times 10^{-2}$ |
| Sample 3  | $1.1 \times 10^1$    | $6.0 \times 10^{-1} \pm 2.0 \times 10^{-2}$ | $5.8 \times 10^{-1} \pm 2.0 \times 10^{-2}$ | $1.5 \times 10^{-1} \pm 4.3 \times 10^{-3}$ |
| Sample 4  | $2.3 \times 10^1$    | $7.3 \times 10^{-1} \pm 4.6 \times 10^{-2}$ | $7.2 \times 10^{-1} \pm 1.4 \times 10^{-2}$ | $3.2 \times 10^{-1} \pm 1.9 \times 10^{-2}$ |
| Sample 5  | $2.0 \times 10^1$    | $6.9 \times 10^{-1} \pm 1.7 \times 10^{-2}$ | $6.5 \times 10^{-1} \pm 2.4 \times 10^{-2}$ | $1.9 \times 10^{-1} \pm 8.1 \times 10^{-3}$ |
| Sample 6  | $1.7 \times 10^1$    | $7.3 \times 10^{-1} \pm 1.2 \times 10^{-2}$ | $6.9 \times 10^{-1} \pm 3.0 \times 10^{-2}$ | $3.2 \times 10^{-1} \pm 7.2 \times 10^{-3}$ |
| Sample 7  | $1.7 \times 10^1$    | $7.4 \times 10^{-1} \pm 2.3 \times 10^{-2}$ | $7.2 \times 10^{-1} \pm 3.1 \times 10^{-2}$ | $3.8 \times 10^{-1} \pm 2.1 \times 10^{-2}$ |
| Sample 8  | $1.5 \times 10^1$    | $7.9 \times 10^{-1} \pm 4.2 \times 10^{-2}$ | $7.5 \times 10^{-1} \pm 3.7 \times 10^{-2}$ | $3.2 \times 10^{-1} \pm 1.7 \times 10^{-2}$ |
| Sample 9  | $2.1 \times 10^1$    | $7.7 \times 10^{-1} \pm 4.4 \times 10^{-2}$ | $7.0 \times 10^{-1} \pm 1.3 \times 10^{-2}$ | $4.0 \times 10^{-1} \pm 2.7 \times 10^{-2}$ |
| Sample 10 | $7.4 \times 10^0$    | $4.8 \times 10^{-1} \pm 1.5 \times 10^{-2}$ | $4.6 \times 10^{-1} \pm 1.9 \times 10^{-2}$ | $1.7 \times 10^{-1} \pm 2.8 \times 10^{-2}$ |
| Sample 11 | $1.8 \times 10^1$    | $7.1 \times 10^{-1} \pm 1.5 \times 10^{-2}$ | $6.6 \times 10^{-1} \pm 1.4 \times 10^{-2}$ | $3.1 \times 10^{-1} \pm 2.7 \times 10^{-3}$ |
| Sample 12 | $1.5 \times 10^1$    | $5.8 \times 10^{-1} \pm 3.3 \times 10^{-2}$ | $5.7 \times 10^{-1} \pm 2.1 \times 10^{-2}$ | $2.5 \times 10^{-1} \pm 6.9 \times 10^{-3}$ |
| Sample 13 | $1.4 \times 10^1$    | $5.6 \times 10^{-1} \pm 1.6 \times 10^{-2}$ | $5.5 \times 10^{-1} \pm 2.5 \times 10^{-2}$ | $2.8 \times 10^{-1} \pm 2.0 \times 10^{-2}$ |
| Sample 14 | $1.3 \times 10^1$    | $5.9 \times 10^{-1} \pm 2.4 \times 10^{-2}$ | $5.7 \times 10^{-1} \pm 5.3 \times 10^{-2}$ | $2.1 \times 10^{-1} \pm 1.0 \times 10^{-2}$ |
| Sample 15 | $1.2 \times 10^1$    | $6.4 \times 10^{-1} \pm 4.3 \times 10^{-2}$ | $6.1 \times 10^{-1} \pm 1.6 \times 10^{-2}$ | $3.8 \times 10^{-1} \pm 4.4 \times 10^{-4}$ |
| Sample 16 | $2.1 \times 10^1$    | $7.4 \times 10^{-1} \pm 2.1 \times 10^{-2}$ | $7.1 \times 10^{-1} \pm 4.0 \times 10^{-3}$ | $4.0 \times 10^{-1} \pm 1.3 \times 10^{-2}$ |
| Sample 17 | $2.6 \times 10^1$    | $7.9 \times 10^{-1} \pm 1.9 \times 10^{-2}$ | $7.3 \times 10^{-1} \pm 1.9 \times 10^{-2}$ | $4.0 \times 10^{-1} \pm 2.0 \times 10^{-2}$ |
| Sample 18 | $1.9 \times 10^1$    | $7.4 \times 10^{-1} \pm 3.8 \times 10^{-2}$ | $7.6 \times 10^{-1} \pm 3.6 \times 10^{-2}$ | $3.6 \times 10^{-1} \pm 2.6 \times 10^{-2}$ |
| Sample 19 | $1.5 \times 10^1$    | $6.6 \times 10^{-1} \pm 5.7 \times 10^{-2}$ | $6.0 \times 10^{-1} \pm 1.2 \times 10^{-2}$ | $2.0 \times 10^{-1} \pm 4.0 \times 10^{-3}$ |
| Sample 20 | $1.3 \times 10^1$    | $6.7 \times 10^{-1} \pm 7.6 \times 10^{-3}$ | $6.7 \times 10^{-1} \pm 7.4 \times 10^{-3}$ | $3.0 \times 10^{-1} \pm 1.2 \times 10^{-2}$ |
| Sample 21 | $1.4 \times 10^1$    | $6.5 \times 10^{-1} \pm 5.5 \times 10^{-2}$ | $6.2 \times 10^{-1} \pm 3.4 \times 10^{-2}$ | $2.6 \times 10^{-1} \pm 6.5 \times 10^{-3}$ |
| Sample 22 | $1.6 \times 10^1$    | $6.5 \times 10^{-1} \pm 6.0 \times 10^{-2}$ | $6.1 \times 10^{-1} \pm 5.0 \times 10^{-2}$ | $2.8 \times 10^{-1} \pm 1.1 \times 10^{-2}$ |
| Sample 23 | $2.3 \times 10^1$    | $7.2 \times 10^{-1} \pm 4.0 \times 10^{-2}$ | $7.2 \times 10^{-1} \pm 2.5 \times 10^{-2}$ | $3.8 \times 10^{-1} \pm 3.0 \times 10^{-2}$ |
| Sample 24 | $1.6 \times 10^0$    | $4.0 \times 10^{-1} \pm 1.1 \times 10^{-2}$ | $3.9 \times 10^{-1} \pm 2.0 \times 10^{-2}$ | $1.1 \times 10^{-1} \pm 1.1 \times 10^{-2}$ |
| Sample 25 | $1.7 \times 10^0$    | $4.1 \times 10^{-1} \pm 1.0 \times 10^{-2}$ | $3.9 \times 10^{-1} \pm 1.0 \times 10^{-2}$ | $1.1 \times 10^{-1} \pm 1.4 \times 10^{-2}$ |
| Sample 26 | $1.6 \times 10^0$    | $4.0 \times 10^{-1} \pm 1.2 \times 10^{-2}$ | $3.9 \times 10^{-1} \pm 1.4 \times 10^{-2}$ | $1.1 \times 10^{-1} \pm 1.4 \times 10^{-2}$ |
| Sample 27 | $4.8 \times 10^0$    | $5.4 \times 10^{-1} \pm 1.2 \times 10^{-2}$ | $5.2 \times 10^{-1} \pm 1.5 \times 10^{-2}$ | $1.5 \times 10^{-1} \pm 9.1 \times 10^{-3}$ |

**Supplementary Table 2. Viscosity and titre ratio (IAV) of pronase-treated sputum samples.**

|           | Viscosity (Pa-s)     | Titre Ratio (IAV), mean $\pm$ SD            |                                             |                |
|-----------|----------------------|---------------------------------------------|---------------------------------------------|----------------|
|           |                      | 80% Ethanol                                 | 70% 2-Propanol                              | 60% 1-Propanol |
| saline    | $1.0 \times 10^{-3}$ | $0.0 \pm 0.0$                               | $0.0 \pm 0.0$                               | $0.0 \pm 0.0$  |
| Sample 1  | $7.6 \times 10^{-2}$ | $3.4 \times 10^{-2} \pm 5.5 \times 10^{-4}$ | $3.3 \times 10^{-2} \pm 1.3 \times 10^{-3}$ | $0.0 \pm 0.0$  |
| Sample 2  | $1.6 \times 10^{-2}$ | $0.0 \pm 0.0$                               | $0.0 \pm 0.0$                               | $0.0 \pm 0.0$  |
| Sample 3  | $5.0 \times 10^{-2}$ | $0.0 \pm 0.0$                               | $0.0 \pm 0.0$                               | $0.0 \pm 0.0$  |
| Sample 4  | $4.2 \times 10^{-2}$ | $0.0 \pm 0.0$                               | $0.0 \pm 0.0$                               | $0.0 \pm 0.0$  |
| Sample 5  | $2.1 \times 10^{-2}$ | $0.0 \pm 0.0$                               | $0.0 \pm 0.0$                               | $0.0 \pm 0.0$  |
| Sample 6  | $3.4 \times 10^{-2}$ | $0.0 \pm 0.0$                               | $0.0 \pm 0.0$                               | $0.0 \pm 0.0$  |
| Sample 7  | $2.3 \times 10^{-2}$ | $0.0 \pm 0.0$                               | $0.0 \pm 0.0$                               | $0.0 \pm 0.0$  |
| Sample 8  | $4.1 \times 10^{-2}$ | $0.0 \pm 0.0$                               | $0.0 \pm 0.0$                               | $0.0 \pm 0.0$  |
| Sample 9  | $4.9 \times 10^{-2}$ | $0.0 \pm 0.0$                               | $0.0 \pm 0.0$                               | $0.0 \pm 0.0$  |
| Sample 10 | $2.4 \times 10^{-2}$ | $0.0 \pm 0.0$                               | $0.0 \pm 0.0$                               | $0.0 \pm 0.0$  |
| Sample 11 | $3.3 \times 10^{-2}$ | $0.0 \pm 0.0$                               | $0.0 \pm 0.0$                               | $0.0 \pm 0.0$  |
| Sample 12 | $4.9 \times 10^{-2}$ | $0.0 \pm 0.0$                               | $0.0 \pm 0.0$                               | $0.0 \pm 0.0$  |
| Sample 13 | $3.6 \times 10^{-2}$ | $0.0 \pm 0.0$                               | $0.0 \pm 0.0$                               | $0.0 \pm 0.0$  |
| Sample 14 | $1.6 \times 10^{-2}$ | $0.0 \pm 0.0$                               | $0.0 \pm 0.0$                               | $0.0 \pm 0.0$  |
| Sample 15 | $3.0 \times 10^{-2}$ | $0.0 \pm 0.0$                               | $0.0 \pm 0.0$                               | $0.0 \pm 0.0$  |
| Sample 16 | $4.7 \times 10^{-2}$ | $0.0 \pm 0.0$                               | $0.0 \pm 0.0$                               | $0.0 \pm 0.0$  |
| Sample 17 | $3.6 \times 10^{-2}$ | $0.0 \pm 0.0$                               | $0.0 \pm 0.0$                               | $0.0 \pm 0.0$  |
| Sample 18 | $4.9 \times 10^{-2}$ | $0.0 \pm 0.0$                               | $0.0 \pm 0.0$                               | $0.0 \pm 0.0$  |
| Sample 19 | $4.6 \times 10^{-2}$ | $0.0 \pm 0.0$                               | $0.0 \pm 0.0$                               | $0.0 \pm 0.0$  |
| Sample 20 | $6.3 \times 10^{-2}$ | $0.0 \pm 0.0$                               | $0.0 \pm 0.0$                               | $0.0 \pm 0.0$  |
| Sample 21 | $3.3 \times 10^{-2}$ | $0.0 \pm 0.0$                               | $0.0 \pm 0.0$                               | $0.0 \pm 0.0$  |
| Sample 22 | $7.0 \times 10^{-2}$ | $0.0 \pm 0.0$                               | $0.0 \pm 0.0$                               | $0.0 \pm 0.0$  |
| Sample 23 | $7.2 \times 10^{-2}$ | $2.9 \times 10^{-2} \pm 1.0 \times 10^{-3}$ | $2.8 \times 10^{-2} \pm 1.5 \times 10^{-3}$ | $0.0 \pm 0.0$  |
| Sample 24 | $1.7 \times 10^{-2}$ | $0.0 \pm 0.0$                               | $0.0 \pm 0.0$                               | $0.0 \pm 0.0$  |
| Sample 25 | $3.3 \times 10^{-2}$ | $0.0 \pm 0.0$                               | $0.0 \pm 0.0$                               | $0.0 \pm 0.0$  |
| Sample 26 | $5.1 \times 10^{-2}$ | $0.0 \pm 0.0$                               | $0.0 \pm 0.0$                               | $0.0 \pm 0.0$  |
| Sample 27 | $7.0 \times 10^{-2}$ | $0.0 \pm 0.0$                               | $0.0 \pm 0.0$                               | $0.0 \pm 0.0$  |

**Supplementary Table 3. Titre ratios were compared between pronase-treated and untreated groups based on inactivation test results.**

|                                         | Saline    | Sputum      | Sputum + Pronase | <i>P</i> value* |
|-----------------------------------------|-----------|-------------|------------------|-----------------|
| Sample number                           |           | 27          | 27               |                 |
| Viscosity, Pa·s, mean ± SD              | 0.001     | 14.1 ± 6.7  | 0.040 ± 0.018    | <0.001          |
| Titre ratio, mean ± SD (80% Ethanol)    | 0.0 ± 0.0 | 0.64 ± 0.12 | 0.002 ± 0.008    | <0.001          |
| Titre ratio, mean ± SD (70% 2-Propanol) | 0.0 ± 0.0 | 0.61 ± 0.11 | 0.002 ± 0.008    | <0.001          |
| Titre ratio, mean ± SD (60% 1-Propanol) | 0.0 ± 0.0 | 0.27 ± 0.10 | 0.0 ± 0.0        | <0.001          |

\* *P* value; Sputum vs. Sputum + Pronase

**Supplementary Table 4. Resistance to UV radiation of IAV in sputum samples with or without pronase treatment.**

|                                                       | Saline                                          | Sputum                                          | Sputum + Pronase                                | <i>P</i> value* |
|-------------------------------------------------------|-------------------------------------------------|-------------------------------------------------|-------------------------------------------------|-----------------|
| Sample number                                         |                                                 | 27                                              | 27                                              |                 |
| Viscosity, Pa·s, mean ± SD                            | 0.001                                           | 14.1 ± 6.7                                      | 0.040 ± 0.018                                   | <0.001          |
| Titre ratio, mean ± SD (UV, 0 mJ/cm <sup>2</sup> )    | 1.0 ± 0.0                                       | 1.0 ± 0.0                                       | 1.0 ± 0.0                                       |                 |
| Titre ratio, mean ± SD (UV, 2.25 mJ/cm <sup>2</sup> ) | 1.5 × 10 <sup>-2</sup> ± 2.0 × 10 <sup>-4</sup> | 1.4 × 10 <sup>-2</sup> ± 2.3 × 10 <sup>-4</sup> | 1.4 × 10 <sup>-2</sup> ± 2.9 × 10 <sup>-4</sup> | 0.059           |
| Titre ratio, mean ± SD (UV, 4.5 mJ/cm <sup>2</sup> )  | 1.0 × 10 <sup>-3</sup> ± 9.6 × 10 <sup>-5</sup> | 9.7 × 10 <sup>-4</sup> ± 2.9 × 10 <sup>-5</sup> | 9.7 × 10 <sup>-4</sup> ± 2.1 × 10 <sup>-5</sup> | 0.776           |
| Titre ratio, mean ± SD (UV, 6.75 mJ/cm <sup>2</sup> ) | 0.0 ± 0.0                                       | 0.0 ± 0.0                                       | 0.0 ± 0.0                                       |                 |

\* *P* value; Sputum vs. Sputum + Pronase
